# Supplementary material
Source: PubMed Central journal article supplement (PMC2883865)

**Supplemental Legends:**

**Figure S1. YopE does not affect caspase-1 activation in response to *Yersinia* infection and Caspase-1 activation occurs in response *Yersinia* infection in NLRP3- or NLRC4-deficient cells.** (A) C57BL/6 bone marrow macrophages were infected with isogenic WT,  $\Delta yopE$ ,  $\Delta yopJ$ , and  $\Delta yopEJ$  strains, and lysates harvested at indicated times post-infection. Cell lysates were probed with anti-caspase-1 antibodies to assay for presence of cleaved p10 subunit. *Salmonella typhimurium* (Stm) and isogenic Stm  $\Delta sipB$  serve as positive and negative controls, respectively. The presence or absence of YopE does not impact the extent of caspase-1 activation in response to *Y. pseudotuberculosis* infection. (B) BMMs from *Nlrc4*<sup>-/-</sup> (left panel) or *Nlrp3*<sup>-/-</sup> (right panel) mice were infected with WT,  $\Delta yopEHJ$ , or T3SS *Yersinia* strains, or with *S. typhimurium* (Stm) or treated with LPS+Nigericin (Ng) as indicated. Cell lysates were harvested at indicated times post-infection and probed for caspase-1 activation (p10).

**Figure S2. Bacterial flagellin is not responsible for caspase-1 activation in response to the *Yersinia* T3SS.** C57BL/6 macrophages were infected with isogenic bacterial strains of the T3SS strain (A) or  $\Delta yopJK$  strain (B) in which the *fliC* locus, which encodes bacterial flagellin was either ablated by in-frame deletion ( $\Delta fliC$ ) or left intact, as indicated. Whole cell lysates were harvested at 0 and 120 minutes post-infection, as indicated. (C) BMMs from B6 or *Nlrc4*<sup>-/-</sup> mice were also infected with  $\Delta yopJK$  or  $\Delta yopJK fliC$  strains, or  $\Delta yopJ$  strain as negative control, and analyzed for caspase-1 cleavage.

**Figure S3. YopK prevents macrophage production of caspase-1 dependent cytokines and *Yersinia* flagellin does not contribute to IL-1 $\beta$  production** (A) Macrophages from B6, *Asc*<sup>-/-</sup> and *Nlrp3*<sup>-/-</sup> mice were treated with 50 ng/ml LPS for 3 hours, infected with indicated bacterial strains, supernatants were harvested 2 hours post-infection and analyzed by ELISA for production of IL-1 $\beta$  and IL-6 or (B) IL-18. (C) Macrophages from B6, *Nlrp3*<sup>-/-</sup>, and *Nlrc4*<sup>-/-</sup> mice were treated with 50 ng/ml LPS for 3 hours infected with indicated bacterial strains, supernatants were harvested 2 hours post-infection and analyzed by ELISA for production of IL-1 $\beta$  and IL-6.

**Figure S4. LPS pretreatment inhibits caspase-1 activation in response to wild-type *Yersinia* but not in response to the *Yersinia* T3SS.** C57BL/6 BMMs were either pretreated with LPS for 2 hours prior to infection or left untreated, followed by infection with indicated bacterial strains. Whole cell lysates were harvested at 0, 60, and 120 minutes post-infection, as indicated, and analyzed by SDS-PAGE and western blotting for the caspase-1 p10 subunit.

**Figure S5. YopK is translocated in a T3SS-dependent manner but does not prevent caspase-1 activation *in trans*.** (A) BMMs from C57BL/6 mice were infected either singly at an MOI of 15 with T3SS strain containing vector control or a YopK expression plasmid, or co-infected at an MOI of 30 with both bacterial strains. At 60 and 120 minutes post-infection, whole-cell lysates were harvested and assayed for caspase-1 activation by western blotting. (B) BMMs were infected with T3SS or  $\Delta yopB$  *Yersinia* strains expressing a YopK-GSK tagged protein (C) BMMs were infected with T3SS, T3SS harboring a YopK expression plasmid, and T3SS harboring an isogenic YopK-GSK tag expression plasmid. At indicated times post-infection, whole cell lysates were harvested and assayed for caspase-1 activation by western blotting for caspase-1 p10. (D) BMMs were infected with indicated *Yersinia* strains and harvested 120 minutes post-infection. Cell lysates were assayed for caspase-1 activation by western blotting.

**Figure S6. Caspase-1 deficient mice are not generally more susceptible to bacterial infection and T3SS vector and T3SS pYopK initially colonize spleen at equal levels.** (A) Age-matched WT (white circles) or *Casp1*<sup>-/-</sup> (gray circles) mice were infected intraperitoneally with  $1 \times 10^5$  cfu of IP2666c *phoP* bacteria and bacterial loads in the spleen determined four days post-infection. (B) Age-matched WT (C57BL/6) mice were infected intraperitoneally with either T3SS vector control (black squares) or T3SS pYopK (black triangles) *Yersinia*. Spleen homogenates were prepared 24 hours post-infection and assayed for bacterial CFU/g spleen.

### Supplemental Table 1. Bacterial strains and plasmids used in this work

| Strain<br>Genotype | Description                                                                                                                          | Source or Reference                  |
|--------------------|--------------------------------------------------------------------------------------------------------------------------------------|--------------------------------------|
| IP2666 (WT)        | Wild-type <i>Y. pseudotuberculosis</i> O:3 strain                                                                                    | (Black and Bliska, 1997)             |
| pYV-               | IP2666 cured of virulence plasmid                                                                                                    | (Grabenstein et al., 2004)           |
| <i>phoP</i>        | pYV- <i>phoP</i> mutant                                                                                                              | (Grabenstein et al., 2004)           |
| <i>yopJ</i>        | IP2666 <i>yopJ</i> mutant                                                                                                            | (Lilo et al., 2008)                  |
| <i>yopEJ</i>       | IP2666 <i>yopEJ</i> double mutant                                                                                                    | (Lilo et al., 2008)                  |
| <i>yopEHJ</i>      | IP2666 <i>yopEHJ</i> triple mutant                                                                                                   | This work, (Viboud and Bliska, 2001) |
| <i>yopK</i>        | IP2666 <i>yopK</i> mutant                                                                                                            | This work, (Ryndak et al., 2005)     |
| <i>yopJK</i>       | IP2666 <i>yopJK</i> double mutant                                                                                                    | This work                            |
| <i>yopJKB</i>      | IP2666 <i>yopJKB</i> triple mutant                                                                                                   | This work                            |
| mCD1               | Modified CD1 virulence plasmid from <i>Y. pestis</i> lacking all known effectors but expressing functional type III secretion system | (Bartra et al., 2006)                |
| T3SS               | pYV- reconstituted with mCD1                                                                                                         | This work                            |
| pProH (Vector)     | pMMB67EH plasmid containing <i>yopH</i> promoter                                                                                     | (Black and Bliska, 1997)             |
| pPYopK             | pProH driving <i>YopK</i> expression                                                                                                 | This work                            |
| T3SS pYopK         | T3SS containing pPYopK                                                                                                               | This work                            |
| T3SS pYopK-GSK     | T3SS containing pPYopK-GSK-3 $\beta$ tag fusion                                                                                      | This work                            |
| T3SS pYopK-FLAG    | T3SS containing pProH- <i>YopK</i> -3X FLAG fusion                                                                                   | This work                            |

### Supplemental References:

Bartra, S.S., Jackson, M.W., Ross, J.A., and Plano, G.V. (2006). Calcium-regulated type III secretion of Yop proteins by an *Escherichia coli* hha mutant carrying a *Yersinia pestis* pCD1 virulence plasmid. *Infect Immun* 74, 1381-1386.

Black, D.S., and Bliska, J.B. (1997). Identification of p130Cas as a substrate of *Yersinia* YopH (Yop51), a bacterial protein tyrosine phosphatase that translocates into mammalian cells and targets focal adhesions. *EMBO J* 16, 2730-2744.

Grabenstein, J.P., Marceau, M., Pujol, C., Simonet, M., and Bliska, J.B. (2004). The response regulator PhoP of *Yersinia pseudotuberculosis* is important for replication in macrophages and for virulence. *Infect Immun* 72, 4973-4984.

Lilo, S., Zheng, Y., and Bliska, J.B. (2008). Caspase-1 activation in macrophages infected with *Yersinia pestis* KIM requires the type III secretion system effector YopJ. *Infect Immun* 76, 3911-3923.

Ryndak, M.B., Chung, H., London, E., and Bliska, J.B. (2005). Role of predicted transmembrane domains for type III translocation, pore formation, and signaling by the *Yersinia pseudotuberculosis* YopB protein. *Infect Immun* 73, 2433-2443.

Viboud, G.I., and Bliska, J.B. (2001). A bacterial type III secretion system inhibits actin polymerization to prevent pore formation in host cell membranes. *Embo J* 20, 5373-5382.

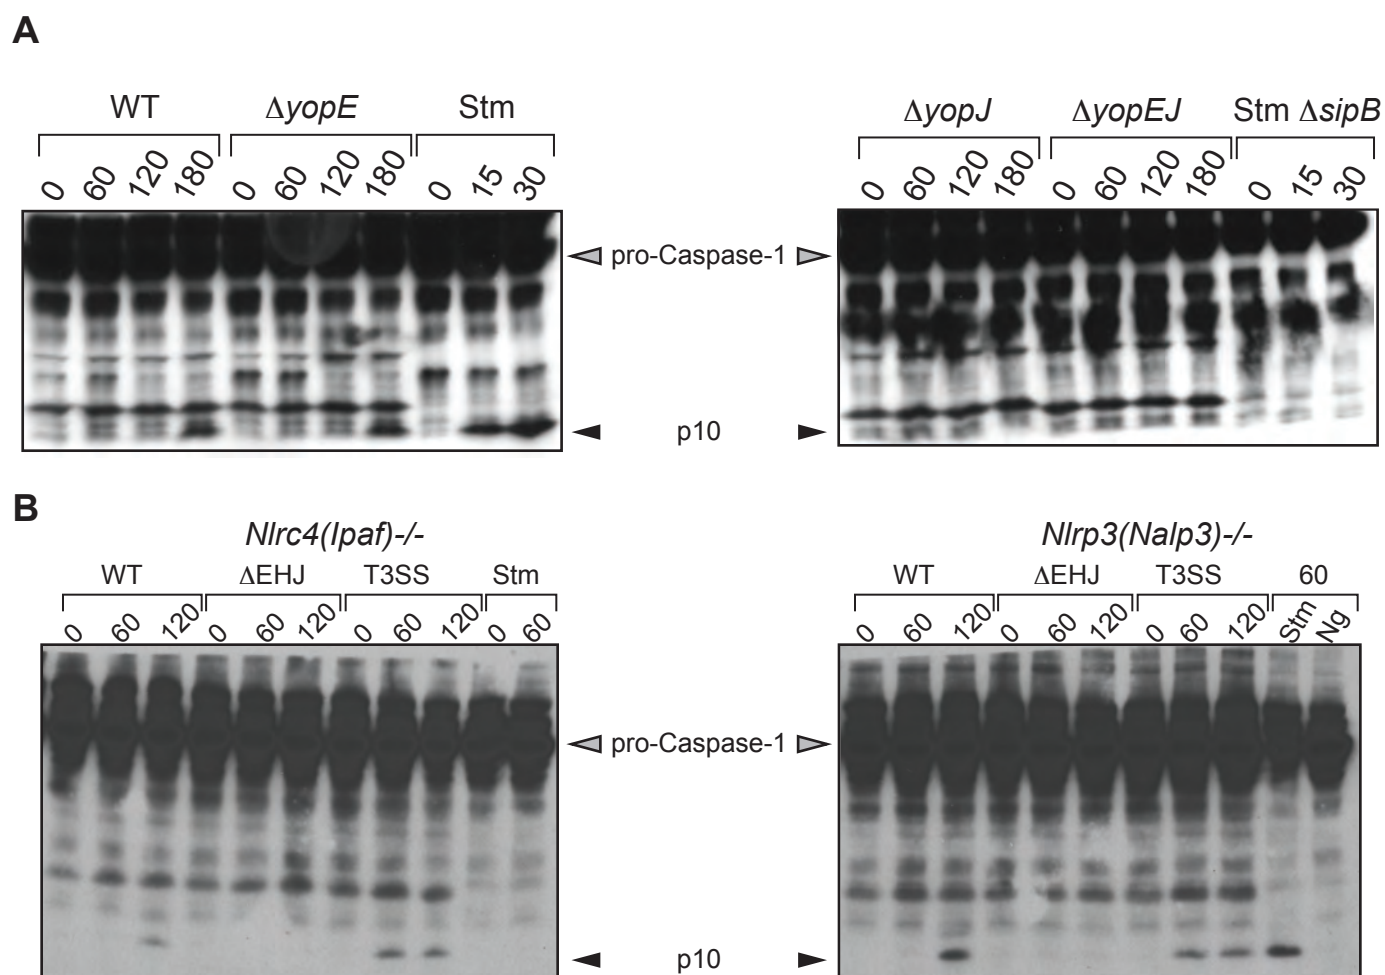

Brodsky et al. Supplemental Figure 2

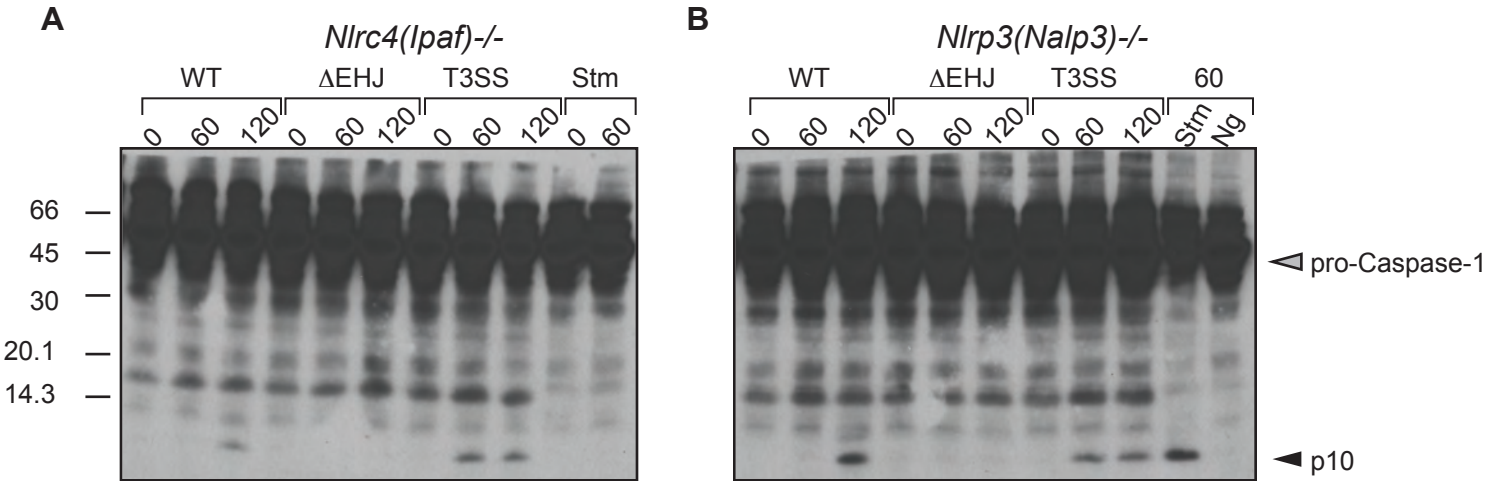

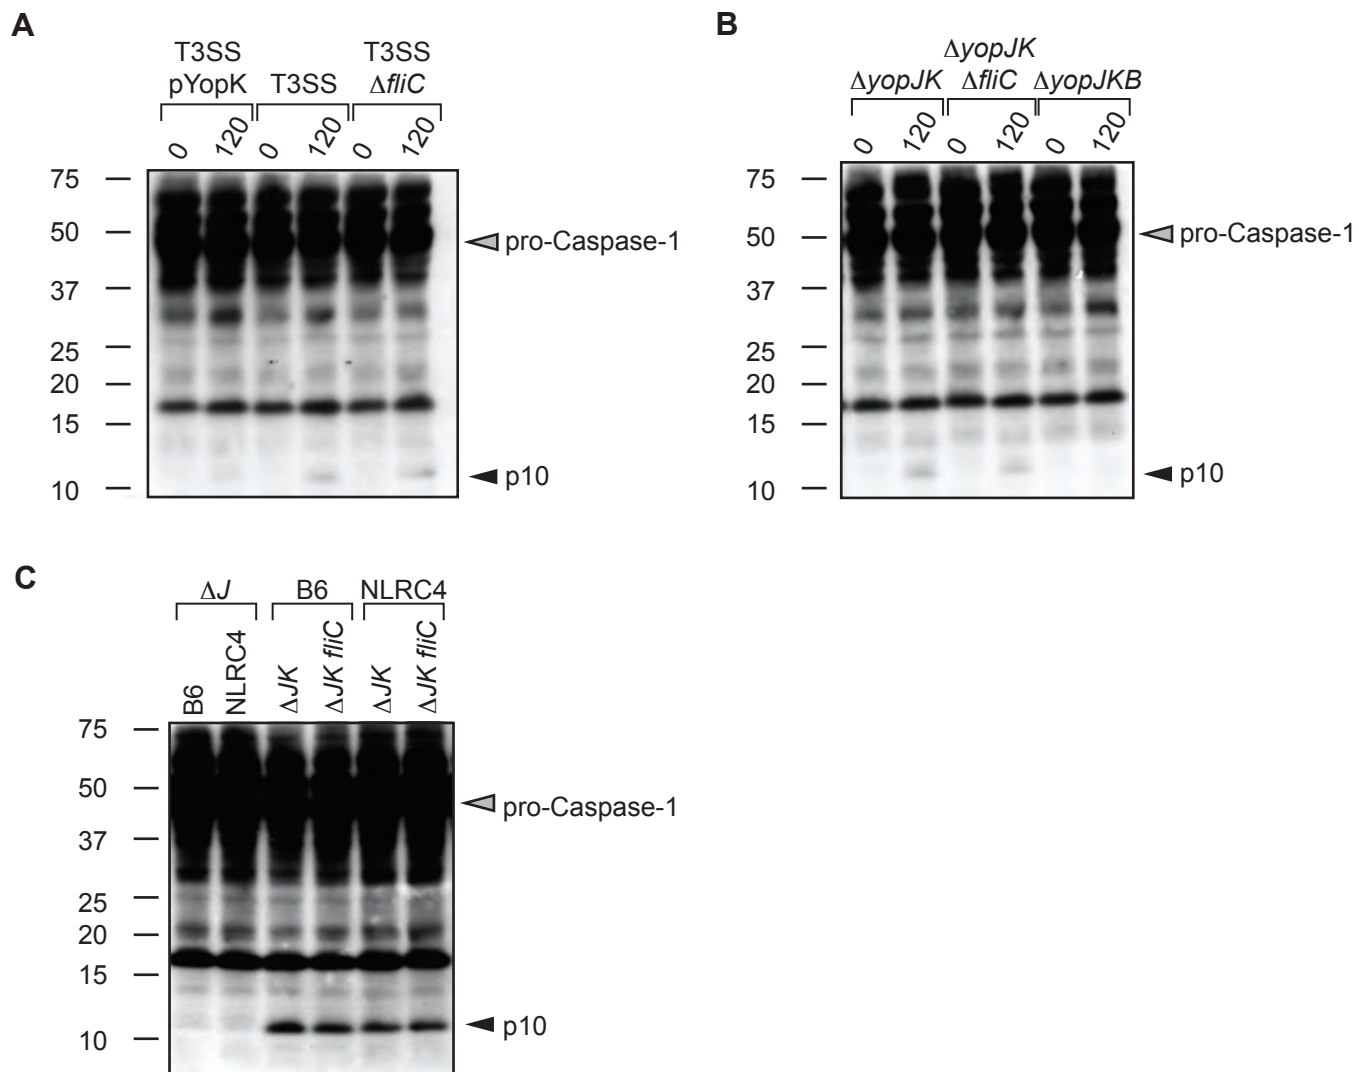

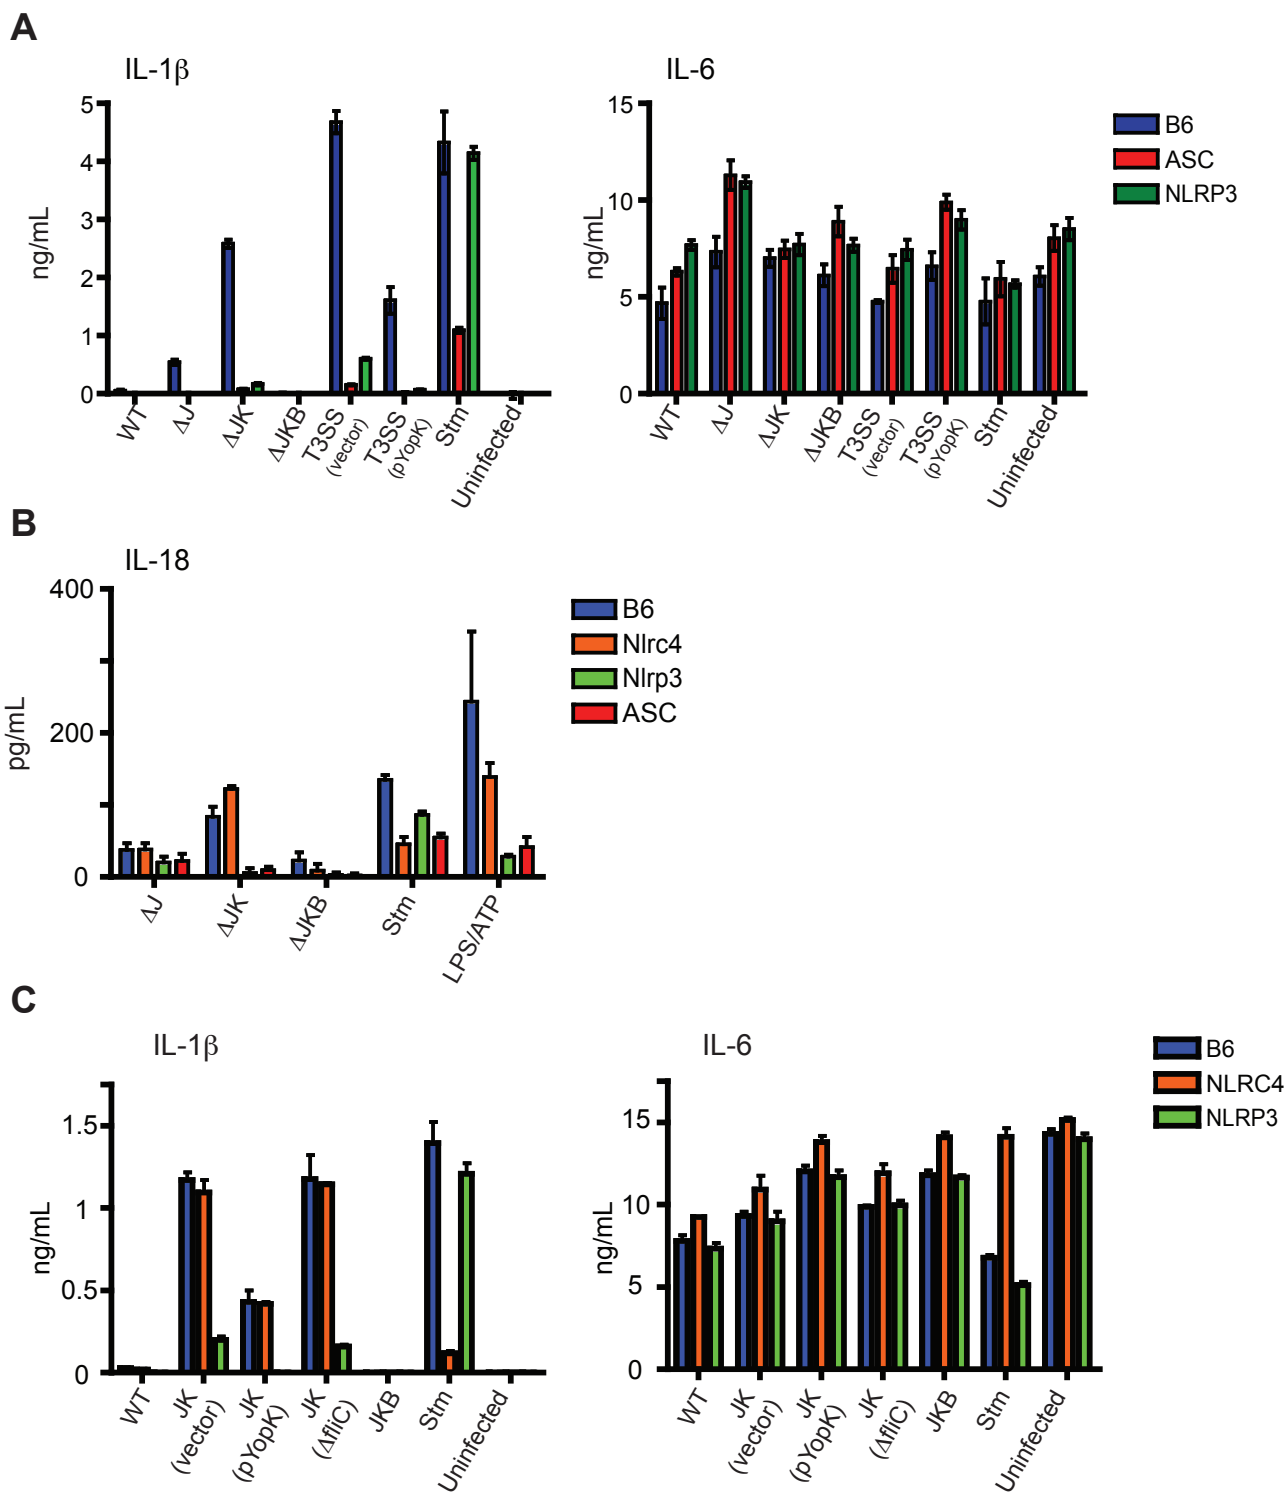



**A**

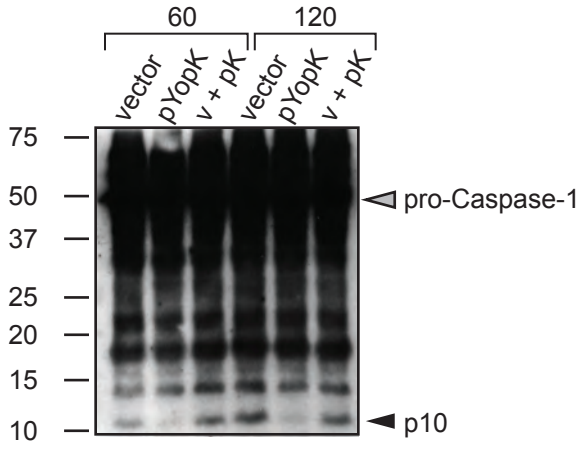

**B**

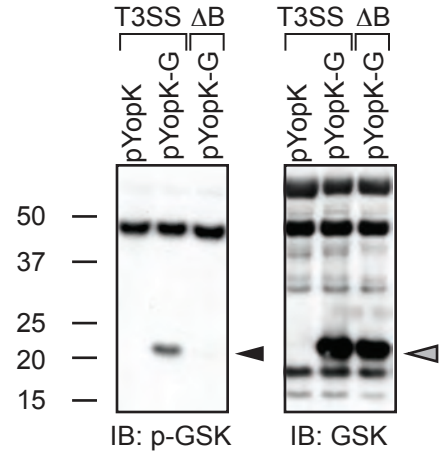

**C**

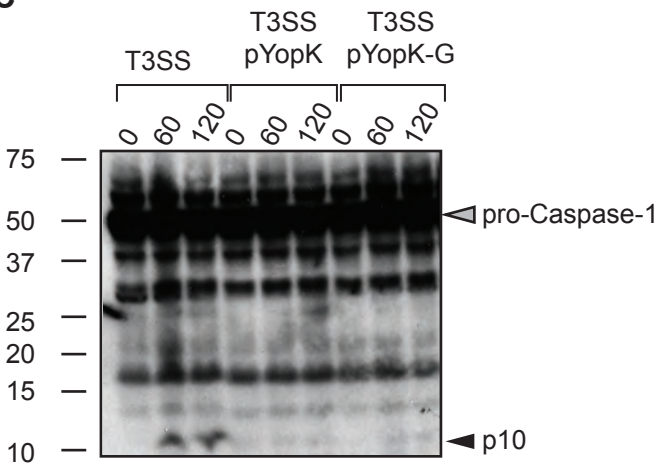

**D**

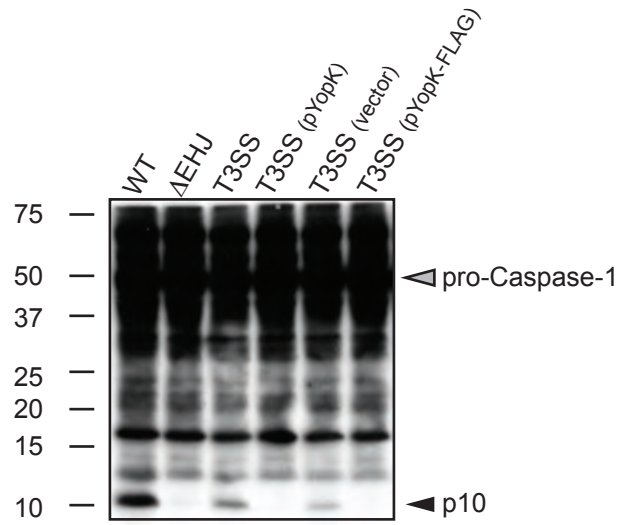

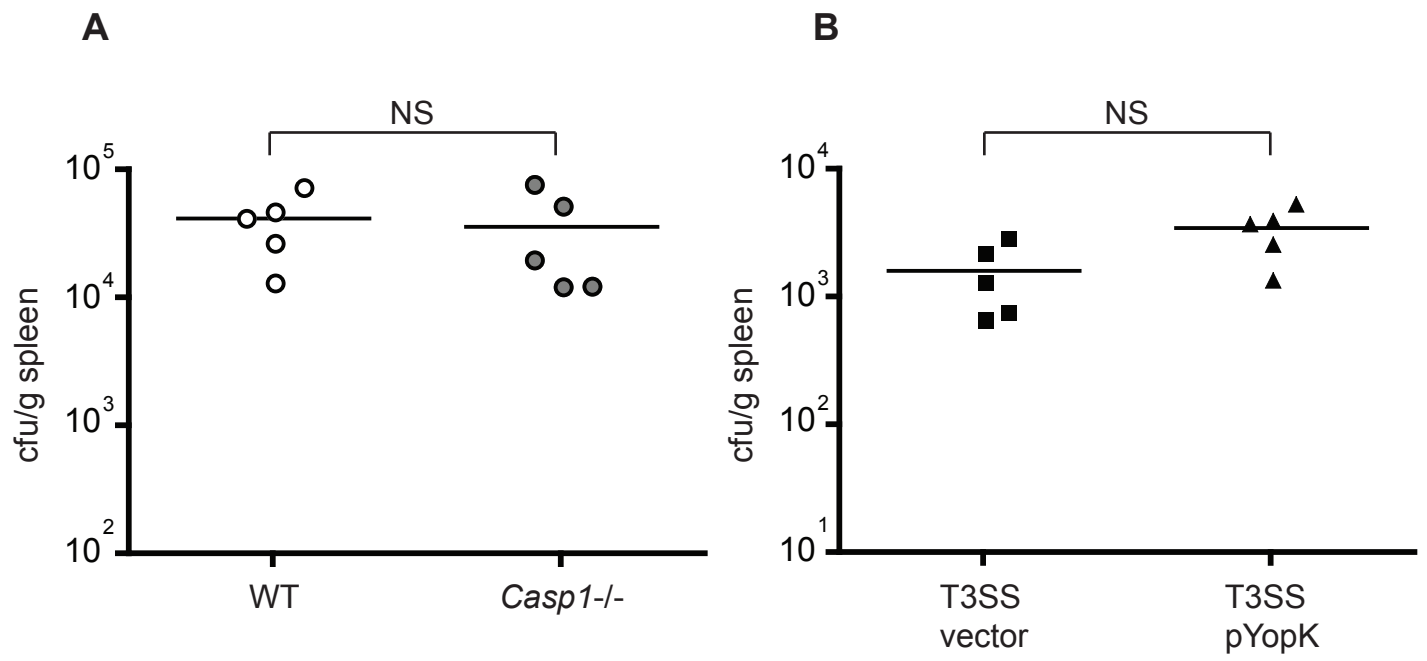

Supplement: NIHMS209248-supplement-01.pdf [file NIHMS209248-supplement-01.pdf]
